# Supplementary material for: Genomic and Transcriptomic Analyses of Malignant Pleural Mesothelioma (MPM) Samples Reveal Crucial Insights for Preclinical Testing
Source: Cancers (Basel). 2023 May 18;15(10):2813. doi: 10.3390/cancers15102813 (PMC10216513; doi:10.3390/cancers15102813)
Supplement: Supplementary file 1 [file cancers-15-02813-s001.zip]

Archive with 4 entries (4 files):
- Manuscript Laure Supplementary Tables.xlsx
- Manuscript Laure_Supplementary Figures.pdf
- Table S7_Westernblots.xlsx
- Table_S2.xlsx
