# Supplementary material for: Genomic and Transcriptomic Analyses of Malignant Pleural Mesothelioma (MPM) Samples Reveal Crucial Insights for Preclinical Testing
Source: Cancers (Basel). 2023 May 18;15(10):2813. doi: 10.3390/cancers15102813 (PMC10216513; doi:10.3390/cancers15102813)
Supplement: Supplementary file 1 [file cancers-15-02813-s001.zip › Manuscript Laure Supplementary Tables.xlsx]

## Sheet: Table S1
Table S1 Characteristics of patients with tumors used of patient-derived cell line generation
Characteristic		N = 10
Age median at diagnosis (range) (ys)		66 (64 - 90)
Sex, n (%)
	Men	9 (80)
	Woman	1 (10)
Histological subtype, n (%)
	Epithelioid	7 (70)
	Biphasic	3 (30)
OS mean (range) (month)		13.88 (6.24 – 38.73)
PFS mean (range) (month)		10.60 (5.62 – 18.63)

## Sheet: Table S3
Table S3 - Top 100 up-and downregulated genes in tumors compared to patient-derived cell lines
Downregulated in tumors compared to patient-derived cell lines					Upregulated in tumors compared to patient-derived cell lines
gene_id	gene_name	log2 Ratio	pValue		gene_id	gene_name	log2 Ratio	pValue
ENSG00000166923	GREM1	-8.69988	4.96567e-05		ENSG00000244734	HBB	12.9867	5.49192e-08
ENSG00000138675	FGF5	-8.20158	8.03829e-08		ENSG00000179914	ITLN1	11.7546	2.38261e-07
ENSG00000113739	STC2	-7.52855	2.25932e-06		ENSG00000188536	HBA2	11.129	2.38925e-07
ENSG00000197632	SERPINB2	-6.45469	0.000110589		ENSG00000170345	FOS	10.2715	7.8927e-14
ENSG00000013297	CLDN11	-6.28764	6.82508e-08		ENSG00000152583	SPARCL1	9.99733	1.09653e-14
ENSG00000154096	THY1	-6.14312	3.74564e-09		ENSG00000173110	HSPA6	8.97251	7.06561e-13
ENSG00000120937	NPPB	-6.06191	0.000747425		ENSG00000257017	HP	8.79945	3.1366e-07
ENSG00000180875	GREM2	-6.04941	6.42303e-05		ENSG00000125740	FOSB	8.79254	2.8878e-14
ENSG00000135919	SERPINE2	-5.90603	0.000286487		ENSG00000175899	A2M	8.53416	2.26564e-09
ENSG00000242550	SERPINB10	-5.87562	9.9131e-05		ENSG00000188257	PLA2G2A	8.39018	8.20277e-11
ENSG00000134668	SPOCD1	-5.61235	1.00399e-06		ENSG00000186081	KRT5	8.19825	2.40331e-07
ENSG00000109511	ANXA10	-5.4083	8.21291e-07		ENSG00000124107	SLPI	8.17262	1.68362e-08
ENSG00000169213	RAB3B	-5.37436	5.02861e-05		ENSG00000197249	SERPINA1	8.16644	0.000152688
ENSG00000136542	GALNT5	-5.33864	2.90676e-05		ENSG00000206172	HBA1	8.0429	0.000128287
ENSG00000170961	HAS2	-5.17269	0.000495586		ENSG00000123838	C4BPA	7.93458	1.88749e-05
ENSG00000137309	HMGA1	-5.05284	5.46715e-07		ENSG00000081041	CXCL2	7.84293	1.77315e-09
ENSG00000082482	KCNK2	-5.05136	1.07681e-05		ENSG00000198523	PLN	7.70273	4.49027e-12
ENSG00000212724	KRTAP2-3	-4.8925	1.35372e-05		ENSG00000196188	CTSE	7.6272	8.35551e-13
ENSG00000204941	PSG5	-4.82308	0.00353791		ENSG00000240583	AQP1	7.50128	1.96876e-10
ENSG00000146197	SCUBE3	-4.79455	0.00150961		ENSG00000131471	AOC3	7.43815	4.58716e-12
ENSG00000139278	GLIPR1	-4.74571	3.16811e-10		ENSG00000125730	C3	7.43551	3.36425e-08
ENSG00000285218	AC026316.4	-4.72746	1.29628e-05		ENSG00000157765	SLC34A2	7.42683	0.000175447
ENSG00000134363	FST	-4.72244	0.000559001		ENSG00000162772	ATF3	7.33868	3.60777e-15
ENSG00000221852	KRTAP1-5	-4.69873	6.8441e-06		ENSG00000153002	CPB1	7.33212	6.9728e-09
ENSG00000107984	DKK1	-4.66506	1.57776e-05		ENSG00000112936	C7	7.23749	2.0287e-05
ENSG00000183287	CCBE1	-4.5552	0.000105557		ENSG00000272573	MUSTN1	7.2334	1.50647e-12
ENSG00000109743	BST1	-4.53339	0.000444152		ENSG00000123358	NR4A1	7.22766	7.9758e-10
ENSG00000164761	TNFRSF11B	-4.52469	0.000145878		ENSG00000143333	RGS16	7.08321	3.74101e-09
ENSG00000110092	CCND1	-4.50069	1.31561e-08		ENSG00000243696	AC006254.1	7.08286	3.2132e-11
ENSG00000113273	ARSB	-4.49333	6.6683e-06		ENSG00000118729	CASQ2	6.99127	3.98676e-10
ENSG00000118777	ABCG2	-4.41617	5.84124e-05		ENSG00000004799	PDK4	6.98187	1.28193e-08
ENSG00000138623	SEMA7A	-4.3581	4.95571e-07		ENSG00000205420	KRT6A	6.95986	7.38655e-08
ENSG00000139629	GALNT6	-4.34848	0.0011302		ENSG00000113296	THBS4	6.93272	0.000108503
ENSG00000004776	HSPB6	-4.33885	0.000206373		ENSG00000138615	CILP	6.84706	1.61844e-05
ENSG00000197046	SIGLEC15	-4.29573	0.000307339		ENSG00000203857	HSD3B1	6.81294	1.0518e-05
ENSG00000068489	PRR11	-4.26271	2.2048e-05		ENSG00000168743	NPNT	6.80812	1.45452e-08
ENSG00000105664	COMP	-4.20804	0.0143599		ENSG00000187513	GJA4	6.78658	1.78223e-09
ENSG00000168685	IL7R	-4.13201	2.38603e-06		ENSG00000133392	MYH11	6.76759	4.1617e-11
ENSG00000189320	FAM180A	-4.07912	1.3172e-05		ENSG00000133661	SFTPD	6.73915	3.92599e-06
ENSG00000010438	PRSS3	-4.07803	3.32756e-05		ENSG00000109906	ZBTB16	6.61479	2.4163e-06
ENSG00000159251	ACTC1	-4.07611	0.00291317		ENSG00000173432	SAA1	6.57422	9.47717e-06
ENSG00000154678	PDE1C	-4.07039	0.000179695		ENSG00000211592	IGKC	6.54802	0.000119885
ENSG00000198796	ALPK2	-4.0641	2.94634e-05		ENSG00000163909	HEYL	6.50207	3.1554e-12
ENSG00000135318	NT5E	-4.05701	1.19313e-05		ENSG00000158578	ALAS2	6.41473	0.000860627
ENSG00000127824	TUBA4A	-4.01727	1.58611e-05		ENSG00000185615	PDIA2	6.38346	3.43779e-08
ENSG00000173641	HSPB7	-3.98711	8.05003e-05		ENSG00000122877	EGR2	6.35374	2.65498e-08
ENSG00000171848	RRM2	-3.96589	2.10925e-05		ENSG00000176907	TCIM	6.34399	9.46779e-06
ENSG00000138061	CYP1B1	-3.96271	0.000226633		ENSG00000106809	OGN	6.31364	2.45114e-07
ENSG00000198211	AC092143.1	-3.94722	1.16618e-07		ENSG00000106565	TMEM176B	6.29035	3.61766e-05
ENSG00000258947	TUBB3	-3.92599	1.30167e-07		ENSG00000094963	FMO2	6.28708	7.61765e-06
ENSG00000279753	AC011558.1	-3.89964	1.34414e-08		ENSG00000108387	SEPTIN4	6.27866	7.2182e-12
ENSG00000154277	UCHL1	-3.88642	1.5481e-08		ENSG00000189058	APOD	6.24949	0.000830735
ENSG00000181072	CHRM2	-3.88455	1.36001e-06		ENSG00000144802	NFKBIZ	6.21146	9.8065e-15
ENSG00000231924	PSG1	-3.8711	2.63106e-06		ENSG00000169429	CXCL8	6.20009	1.35294e-06
ENSG00000167601	AXL	-3.85306	1.60213e-10		ENSG00000164116	GUCY1A1	6.18777	5.26955e-10
ENSG00000129226	CD68	-3.80297	3.12548e-06		ENSG00000107742	SPOCK2	6.10536	3.01529e-09
ENSG00000164484	TMEM200A	-3.74807	0.00191342		ENSG00000153234	NR4A2	6.08519	1.69e-10
ENSG00000131737	KRT34	-3.74144	3.20659e-06		ENSG00000198576	ARC	6.08399	6.33117e-10
ENSG00000100097	LGALS1	-3.7243	1.20009e-10		ENSG00000128052	KDR	6.03558	8.69358e-12
ENSG00000151012	SLC7A11	-3.71911	8.24323e-05		ENSG00000128422	KRT17	6.02868	3.9341e-07
ENSG00000181019	NQO1	-3.71136	1.92275e-05		ENSG00000143248	RGS5	6.01567	2.12873e-13
ENSG00000181195	PENK	-3.70757	0.0137162		ENSG00000162998	FRZB	6.00522	1.05949e-09
ENSG00000168528	SERINC2	-3.7034	4.1793e-05		ENSG00000149564	ESAM	5.99766	7.97202e-11
ENSG00000146674	IGFBP3	-3.69147	0.000598354		ENSG00000112214	FHL5	5.98677	1.03619e-06
ENSG00000142669	SH3BGRL3	-3.68911	4.84454e-07		ENSG00000111404	RERGL	5.96099	2.78154e-06
ENSG00000148677	ANKRD1	-3.67853	0.00185845		ENSG00000101443	WFDC2	5.9523	2.93166e-07
ENSG00000103485	QPRT	-3.67363	0.000341077		ENSG00000159388	BTG2	5.90587	3.87638e-11
ENSG00000186575	NF2	-3.66977	8.61824e-05		ENSG00000019582	CD74	5.88826	1.07017e-07
ENSG00000163661	PTX3	-3.65717	0.00229343		ENSG00000143196	DPT	5.88387	0.000255624
ENSG00000153904	DDAH1	-3.64682	1.45321e-06		ENSG00000184557	SOCS3	5.85194	2.08492e-10
ENSG00000196230	TUBB	-3.61795	1.93366e-09		ENSG00000002933	TMEM176A	5.83996	4.08833e-05
ENSG00000198826	ARHGAP11A	-3.61705	7.31635e-05		ENSG00000142973	CYP4B1	5.83511	9.48523e-05
ENSG00000197061	HIST1H4C	-3.60596	1.36902e-07		ENSG00000181143	MUC16	5.83345	1.6566e-08
ENSG00000164220	F2RL2	-3.60432	7.12384e-05		ENSG00000101096	NFATC2	5.81835	2.24116e-09
ENSG00000176014	TUBB6	-3.60161	1.0563e-08		ENSG00000273259	AL049839.2	5.79212	1.22782e-05
ENSG00000103187	COTL1	-3.59996	3.14101e-08		ENSG00000196136	SERPINA3	5.78807	1.24594e-05
ENSG00000106991	ENG	-3.59697	0.00287908		ENSG00000107159	CA9	5.77549	2.12278e-08
ENSG00000166825	ANPEP	-3.57974	0.000245653		ENSG00000235750	KIAA0040	5.77537	7.34208e-10
ENSG00000105825	TFPI2	-3.55805	0.00502911		ENSG00000108551	RASD1	5.76084	4.15308e-10
ENSG00000212747	RTL8B	-3.55727	1.91868e-06		ENSG00000103710	RASL12	5.76056	9.90488e-09
ENSG00000169715	MT1E	-3.55266	2.26826e-06		ENSG00000108700	CCL8	5.75886	1.03194e-05
ENSG00000154839	SKA1	-3.55021	3.96978e-05		ENSG00000187479	C11orf96	5.74618	1.66287e-11
ENSG00000184009	ACTG1	-3.54734	1.52442e-07		ENSG00000151468	CCDC3	5.7382	8.39335e-08
ENSG00000111615	KRR1	-3.53198	2.36509e-09		ENSG00000132872	SYT4	5.70816	7.79672e-05
ENSG00000145242	EPHA5	-3.53094	0.000584091		ENSG00000159713	TPPP3	5.69387	2.41832e-08
ENSG00000017483	SLC38A5	-3.5134	0.0051558		ENSG00000169242	EFNA1	5.68368	3.20682e-06
ENSG00000178301	AQP11	-3.50865	0.000145307		ENSG00000143375	CGN	5.68053	1.52151e-08
ENSG00000197594	ENPP1	-3.49956	0.0002698		ENSG00000244094	SPRR2F	5.63732	1.23137e-06
ENSG00000104332	SFRP1	-3.49203	0.00796249		ENSG00000182782	HCAR2	5.62674	0.00079987
ENSG00000184254	ALDH1A3	-3.43125	0.0035733		ENSG00000145824	CXCL14	5.62197	0.000266002
ENSG00000170545	SMAGP	-3.42443	0.000129218		ENSG00000173334	TRIB1	5.61213	4.14715e-09
ENSG00000185742	C11orf87	-3.41931	0.000146614		ENSG00000244731	C4A	5.59708	1.25727e-11
ENSG00000128606	LRRC17	-3.41847	0.0032892		ENSG00000204287	HLA-DRA	5.59302	4.71515e-05
ENSG00000120708	TGFBI	-3.41451	0.000348488		ENSG00000211895	IGHA1	5.57562	0.00025102
ENSG00000155816	FMN2	-3.40523	0.000358289		ENSG00000092295	TGM1	5.56209	4.14901e-05
ENSG00000163827	LRRC2	-3.40227	0.00511586		ENSG00000018625	ATP1A2	5.56087	2.27786e-08
ENSG00000130720	FIBCD1	-3.40112	2.05472e-07		ENSG00000224389	C4B	5.5353	1.5405e-11
ENSG00000117399	CDC20	-3.39858	0.000284474		ENSG00000168032	ENTPD3	5.52694	2.92418e-07
ENSG00000139579	NABP2	-3.38509	5.84678e-06		ENSG00000115221	ITGB6	5.50832	0.000111113
ENSG00000115414	FN1	-3.37862	0.000108624		ENSG00000169116	PARM1	5.5035	2.77771e-07

## Sheet: Table S4
Table S4 - Top 100 up-and downregulated genes in tumors compared to established cell lines
Downregulated in tumors compared to established cell lines					Upregulated in tumors compared to patient-established cell lines
gene_id	gene_name	log2 Ratio	pValue		gene_id	gene_name	log2 Ratio	pValue
ENSG00000231924	PSG1	-9.37164	2.43799e-07		ENSG00000244734	HBB	12.9827	2.45955e-06
ENSG00000183668	PSG9	-8.791	2.0109e-06		ENSG00000179914	ITLN1	12.1355	1.01639e-05
ENSG00000170848	PSG6	-6.3991	6.83331e-08		ENSG00000188536	HBA2	11.1009	1.25818e-05
ENSG00000013297	CLDN11	-6.36966	7.14759e-05		ENSG00000105509	HAS1	10.2227	2.19799e-08
ENSG00000243130	PSG11	-6.11421	0.000137893		ENSG00000152583	SPARCL1	9.99234	1.11341e-12
ENSG00000124467	PSG8	-5.93463	5.70647e-05		ENSG00000173110	HSPA6	9.57122	1.23653e-11
ENSG00000242221	PSG2	-5.89332	1.42418e-06		ENSG00000011465	DCN	9.18469	1.26273e-07
ENSG00000221878	PSG7	-5.83353	7.65198e-05		ENSG00000189058	APOD	8.94788	3.47985e-05
ENSG00000168685	IL7R	-5.82868	1.93394e-07		ENSG00000116690	PRG4	8.93573	1.39099e-08
ENSG00000163283	ALPP	-5.69606	1.03027e-05		ENSG00000123358	NR4A1	8.82465	2.26097e-12
ENSG00000145287	PLAC8	-5.68957	0.00151514		ENSG00000149131	SERPING1	8.80696	6.21695e-12
ENSG00000133169	BEX1	-5.67481	0.000140533		ENSG00000257017	HP	8.73639	1.85037e-05
ENSG00000197632	SERPINB2	-5.65865	0.00588307		ENSG00000240583	AQP1	8.62077	5.39475e-10
ENSG00000211448	DIO2	-5.65813	0.0020952		ENSG00000158859	ADAMTS4	8.58608	1.98075e-11
ENSG00000151012	SLC7A11	-5.64168	3.70992e-06		ENSG00000188257	PLA2G2A	8.47073	1.33188e-07
ENSG00000285218	AC026316.4	-5.50751	0.00040619		ENSG00000170345	FOS	8.46511	4.76348e-09
ENSG00000221826	PSG3	-5.47598	5.73939e-07		ENSG00000186081	KRT5	8.41772	2.47136e-06
ENSG00000137309	HMGA1	-5.44334	5.67129e-06		ENSG00000004799	PDK4	8.33268	3.08663e-08
ENSG00000099194	SCD	-5.33769	0.000968668		ENSG00000196616	ADH1B	8.20032	1.19446e-06
ENSG00000196754	S100A2	-5.32731	0.000581929		ENSG00000154556	SORBS2	8.19946	1.1269e-10
ENSG00000126860	EVI2A	-5.13809	9.92682e-05		ENSG00000186847	KRT14	8.09635	0.000228245
ENSG00000204941	PSG5	-5.11315	0.00564773		ENSG00000164692	COL1A2	8.08172	2.17867e-06
ENSG00000108448	TRIM16L	-5.01356	6.31792e-05		ENSG00000175899	A2M	8.07351	4.92399e-06
ENSG00000242550	SERPINB10	-4.96699	0.00718781		ENSG00000206172	HBA1	8.01557	0.000535776
ENSG00000128340	RAC2	-4.8651	1.68069e-05		ENSG00000148053	NTRK2	8.00472	2.38627e-12
ENSG00000243137	PSG4	-4.85318	0.0159167		ENSG00000106565	TMEM176B	7.97809	6.46494e-11
ENSG00000123453	SARDH	-4.68087	0.00106461		ENSG00000250722	SELENOP	7.92195	1.32151e-10
ENSG00000068489	PRR11	-4.5676	3.96174e-05		ENSG00000123838	C4BPA	7.74426	0.000739636
ENSG00000092929	UNC13D	-4.49183	0.000893016		ENSG00000153234	NR4A2	7.71746	4.54517e-12
ENSG00000138675	FGF5	-4.47514	0.000352922		ENSG00000198523	PLN	7.66865	1.18456e-09
ENSG00000181019	NQO1	-4.36981	3.28825e-05		ENSG00000203783	PRR9	7.6392	1.72387e-05
ENSG00000265118	AC134669.1	-4.28595	0.000445379		ENSG00000169429	CXCL8	7.58326	2.38164e-07
ENSG00000197061	HIST1H4C	-4.25105	3.81881e-09		ENSG00000133392	MYH11	7.51838	1.36648e-09
ENSG00000171848	RRM2	-4.24218	3.86915e-05		ENSG00000244255	AL645922.1	7.51047	1.66766e-06
ENSG00000089685	BIRC5	-4.19635	7.78255e-06		ENSG00000109846	CRYAB	7.49344	1.52013e-11
ENSG00000117399	CDC20	-4.18031	0.00010443		ENSG00000243649	CFB	7.48673	2.01817e-06
ENSG00000134057	CCNB1	-4.13528	0.00013601		ENSG00000118849	RARRES1	7.47112	2.17129e-07
ENSG00000049656	CLPTM1L	-4.12002	0.000498471		ENSG00000198865	CCDC152	7.44654	1.57799e-10
ENSG00000130720	FIBCD1	-4.11995	3.93197e-08		ENSG00000125740	FOSB	7.44528	3.20765e-11
ENSG00000171858	RPS21	-4.11735	1.60337e-11		ENSG00000196188	CTSE	7.4208	4.76827e-09
ENSG00000104833	TUBB4A	-4.11584	0.00133381		ENSG00000157765	SLC34A2	7.37835	0.000726832
ENSG00000186185	KIF18B	-4.08035	0.00034027		ENSG00000153002	CPB1	7.35163	1.85832e-07
ENSG00000135069	PSAT1	-4.05385	0.00112886		ENSG00000131471	AOC3	7.29729	4.17837e-09
ENSG00000213741	RPS29	-4.05234	7.05263e-10		ENSG00000002933	TMEM176A	7.29534	6.65161e-09
ENSG00000196139	AKR1C3	-4.03559	0.00349303		ENSG00000112936	C7	7.28939	0.000202731
ENSG00000198431	TXNRD1	-4.02853	1.31891e-08		ENSG00000132386	SERPINF1	7.2781	6.7225e-10
ENSG00000087586	AURKA	-3.99932	0.000192011		ENSG00000081041	CXCL2	7.24404	2.93196e-07
ENSG00000175063	UBE2C	-3.89137	7.62268e-05		ENSG00000241644	INMT	7.17423	3.79943e-07
ENSG00000087086	FTL	-3.86504	1.05143e-08		ENSG00000162772	ATF3	7.17173	9.65484e-10
ENSG00000037241	RPL26L1	-3.85817	1.20822e-09		ENSG00000122176	FMOD	7.1154	7.2279e-08
ENSG00000166803	PCLAF	-3.85606	5.1572e-05		ENSG00000139329	LUM	7.09718	3.9231e-06
ENSG00000107984	DKK1	-3.78591	0.00362589		ENSG00000143333	RGS16	7.01416	6.8633e-07
ENSG00000187134	AKR1C1	-3.75967	0.0186788		ENSG00000118729	CASQ2	7.0111	2.3902e-06
ENSG00000178150	ZNF114	-3.70899	0.000135289		ENSG00000133661	SFTPD	7.00603	1.92632e-05
ENSG00000118785	SPP1	-3.69404	0.0204862		ENSG00000272573	MUSTN1	7.00011	3.94049e-09
ENSG00000094804	CDC6	-3.68639	0.00138044		ENSG00000136244	IL6	6.99018	2.90015e-09
ENSG00000154277	UCHL1	-3.67918	5.72475e-07		ENSG00000000971	CFH	6.98863	8.2493e-08
ENSG00000103485	QPRT	-3.67103	0.002001		ENSG00000243696	AC006254.1	6.94761	4.68029e-09
ENSG00000167900	TK1	-3.67026	0.000422648		ENSG00000167772	ANGPTL4	6.91832	3.55697e-08
ENSG00000154839	SKA1	-3.65811	0.000191951		ENSG00000143196	DPT	6.89968	0.000641218
ENSG00000163923	RPL39L	-3.65586	0.000512681		ENSG00000188783	PRELP	6.89954	6.00223e-09
ENSG00000067057	PFKP	-3.62594	5.78706e-05		ENSG00000113296	THBS4	6.87534	0.00131773
ENSG00000136810	TXN	-3.62301	9.56215e-08		ENSG00000138615	CILP	6.8556	0.000260201
ENSG00000142657	PGD	-3.61994	7.65604e-05		ENSG00000205420	KRT6A	6.84632	1.08484e-05
ENSG00000228716	DHFR	-3.59365	3.75989e-05		ENSG00000137507	LRRC32	6.83906	5.30172e-10
ENSG00000153044	CENPH	-3.57876	0.000645687		ENSG00000162998	FRZB	6.83514	3.78622e-11
ENSG00000197020	ZNF100	-3.56892	0.00216125		ENSG00000159713	TPPP3	6.83014	7.69419e-09
ENSG00000167637	ZNF283	-3.55157	0.00397279		ENSG00000106483	SFRP4	6.82782	1.68058e-05
ENSG00000108561	C1QBP	-3.54606	4.73956e-09		ENSG00000166278	C2	6.79695	1.32643e-05
ENSG00000183287	CCBE1	-3.54451	0.00677839		ENSG00000144476	ACKR3	6.76863	4.0052e-09
ENSG00000241468	ATP5MF	-3.54297	1.05242e-09		ENSG00000154553	PDLIM3	6.75086	1.08019e-08
ENSG00000136942	RPL35	-3.53618	4.70067e-11		ENSG00000187513	GJA4	6.7506	1.31335e-08
ENSG00000146733	PSPH	-3.51033	0.000524949		ENSG00000129538	RNASE1	6.69693	1.05781e-05
ENSG00000067225	PKM	-3.48197	9.22141e-09		ENSG00000204287	HLA-DRA	6.66589	1.05813e-06
ENSG00000145107	TM4SF19	-3.48021	7.11619e-05		ENSG00000111452	ADGRD1	6.64759	9.76073e-08
ENSG00000131469	RPL27	-3.4786	3.55102e-10		ENSG00000172348	RCAN2	6.64385	1.44808e-06
ENSG00000010292	NCAPD2	-3.47726	0.000255276		ENSG00000174348	PODN	6.62742	4.49287e-10
ENSG00000163931	TKT	-3.4535	4.50106e-08		ENSG00000163431	LMOD1	6.60031	1.66097e-09
ENSG00000198826	ARHGAP11A	-3.44748	0.000550677		ENSG00000203857	HSD3B1	6.59985	0.000553158
ENSG00000123485	HJURP	-3.4363	0.00459354		ENSG00000172137	CALB2	6.59308	2.44899e-06
ENSG00000100162	CENPM	-3.41998	0.0016447		ENSG00000137699	TRIM29	6.56783	2.46808e-05
ENSG00000124614	RPS10	-3.41939	1.38292e-11		ENSG00000197614	MFAP5	6.55595	0.000205678
ENSG00000243509	TNFRSF6B	-3.40996	0.00823926		ENSG00000185615	PDIA2	6.55085	3.7759e-07
ENSG00000137210	TMEM14B	-3.40981	4.42477e-08		ENSG00000109906	ZBTB16	6.54285	5.51038e-07
ENSG00000159259	CHAF1B	-3.40963	0.00280104		ENSG00000133048	CHI3L1	6.54093	0.000546948
ENSG00000196262	PPIA	-3.39467	5.65591e-12		ENSG00000159388	BTG2	6.54051	3.18271e-08
ENSG00000239672	NME1	-3.37481	5.26753e-09		ENSG00000145824	CXCL14	6.51123	0.000153506
ENSG00000164611	PTTG1	-3.37164	2.24572e-05		ENSG00000169116	PARM1	6.491	5.41815e-09
ENSG00000128944	KNSTRN	-3.37018	0.00194489		ENSG00000197249	SERPINA1	6.48096	0.00786414
ENSG00000166851	PLK1	-3.36616	0.00279078		ENSG00000235750	KIAA0040	6.48075	4.21226e-09
ENSG00000111716	LDHB	-3.36536	9.83435e-09		ENSG00000211592	IGKC	6.45313	7.35971e-05
ENSG00000105011	ASF1B	-3.3639	0.00456393		ENSG00000176907	TCIM	6.43472	0.000774106
ENSG00000272162	AL024498.2	-3.36334	3.00535e-08		ENSG00000106809	OGN	6.42118	7.41475e-06
ENSG00000100285	NEFH	-3.36325	0.0269998		ENSG00000158578	ALAS2	6.38763	0.00302509
ENSG00000172809	RPL38	-3.34539	1.72265e-10		ENSG00000147257	GPC3	6.35509	1.79489e-06
ENSG00000100526	CDKN3	-3.34479	0.00208152		ENSG00000122877	EGR2	6.34782	1.4484e-06
ENSG00000100097	LGALS1	-3.33826	3.79411e-08		ENSG00000164330	EBF1	6.34433	1.27667e-09
ENSG00000034510	TMSB10	-3.33821	1.0011e-07		ENSG00000107562	CXCL12	6.3317	6.05851e-05
ENSG00000171208	NETO2	-3.33523	0.000822438		ENSG00000128016	ZFP36	6.32708	4.09988e-10
ENSG00000119408	NEK6	-3.33228	0.000195202		ENSG00000049323	LTBP1	6.32404	5.45853e-09

## Sheet: Table S5
Table S5 - Top 100 up-and downregulated genes in patient-derived cell lines compared to established cell lines
Downgulated in patient-derived celllines compared to established cell lines					Upregulated in patient-derived celllines compared to established celllines
gene_id	gene_name	log2 Ratio	pValue		gene_id	gene_name	log2 Ratio	pValue
ENSG00000211448	DIO2	-7.80956	1.1237e-05		ENSG00000164692	COL1A2	10.839	1.07992e-07
ENSG00000125726	CD70	-6.25755	2.31746e-05		ENSG00000011465	DCN	9.46172	3.44389e-06
ENSG00000183668	PSG9	-5.77298	8.59873e-05		ENSG00000166923	GREM1	9.18322	5.75287e-05
ENSG00000145287	PLAC8	-5.58973	0.000540896		ENSG00000197614	MFAP5	8.79099	0.000254745
ENSG00000231924	PSG1	-5.46464	0.000899417		ENSG00000163017	ACTG2	8.10541	0.000175396
ENSG00000243130	PSG11	-5.29751	5.32312e-05		ENSG00000164761	TNFRSF11B	8.08503	8.62113e-06
ENSG00000196754	S100A2	-5.18944	0.000485269		ENSG00000049540	ELN	8.04592	2.99687e-05
ENSG00000049656	CLPTM1L	-5.15503	2.95802e-05		ENSG00000115461	IGFBP5	7.92943	4.03807e-06
ENSG00000092929	UNC13D	-5.03864	1.77398e-06		ENSG00000170961	HAS2	7.761	4.32052e-05
ENSG00000243509	TNFRSF6B	-4.99456	0.000530429		ENSG00000140285	FGF7	7.56178	3.43839e-07
ENSG00000163283	ALPP	-4.89745	0.000330808		ENSG00000173641	HSPB7	7.54434	6.45854e-07
ENSG00000221878	PSG7	-4.73753	6.01761e-05		ENSG00000135919	SERPINE2	7.53768	6.75006e-06
ENSG00000151892	GFRA1	-4.60336	0.000275632		ENSG00000109846	CRYAB	7.33924	3.30233e-07
ENSG00000170848	PSG6	-4.59665	0.000323012		ENSG00000162576	MXRA8	7.25624	3.64626e-05
ENSG00000179059	ZFP42	-4.58706	7.0848e-06		ENSG00000139329	LUM	7.24148	3.25197e-06
ENSG00000143631	FLG	-4.47222	0.00916278		ENSG00000140937	CDH11	7.15134	3.28149e-09
ENSG00000173391	OLR1	-4.42912	0.000954708		ENSG00000107562	CXCL12	7.08832	0.00017836
ENSG00000099194	SCD	-4.356	3.25585e-05		ENSG00000157766	ACAN	6.99354	0.000119044
ENSG00000124467	PSG8	-4.08857	0.00160783		ENSG00000049323	LTBP1	6.87165	5.42688e-05
ENSG00000118785	SPP1	-4.07562	0.00537148		ENSG00000103888	CEMIP	6.74716	4.81223e-05
ENSG00000126878	AIF1L	-4.07161	7.04532e-05		ENSG00000146197	SCUBE3	6.65211	0.000173372
ENSG00000196139	AKR1C3	-3.95956	0.000853605		ENSG00000159251	ACTC1	6.6492	0.000662648
ENSG00000230257	NFE4	-3.9351	2.18587e-07		ENSG00000189320	FAM180A	6.63617	1.13831e-08
ENSG00000221826	PSG3	-3.81812	0.00128428		ENSG00000180875	GREM2	6.5134	4.89509e-06
ENSG00000106538	RARRES2	-3.74132	0.0163492		ENSG00000149131	SERPING1	6.50588	2.75614e-07
ENSG00000126860	EVI2A	-3.71703	0.000207345		ENSG00000106483	SFRP4	6.43984	0.000110492
ENSG00000163347	CLDN1	-3.69277	0.00289441		ENSG00000143387	CTSK	6.31552	2.54133e-05
ENSG00000160867	FGFR4	-3.41038	6.52741e-07		ENSG00000105664	COMP	6.23186	0.000297576
ENSG00000130513	GDF15	-3.37797	0.00745311		ENSG00000124212	PTGIS	6.22646	0.00092229
ENSG00000072310	SREBF1	-3.22974	4.11482e-06		ENSG00000115414	FN1	6.07137	1.1271e-05
ENSG00000180730	SHISA2	-3.20233	0.0194243		ENSG00000107796	ACTA2	6.03558	4.50459e-05
ENSG00000158089	GALNT14	-3.1619	0.00251926		ENSG00000138061	CYP1B1	6.01539	0.000132198
ENSG00000026036	RTEL1-TNFRSF6B	-3.15598	0.000207425		ENSG00000140092	FBLN5	5.93735	2.8155e-05
ENSG00000101187	SLCO4A1	-3.1062	1.48463e-05		ENSG00000129009	ISLR	5.9206	0.000486597
ENSG00000176222	ZNF404	-3.10133	0.00376291		ENSG00000149591	TAGLN	5.88981	5.44042e-05
ENSG00000187134	AKR1C1	-3.0537	0.0201885		ENSG00000164484	TMEM200A	5.84085	2.00556e-05
ENSG00000265118	AC134669.1	-3.03975	0.000438932		ENSG00000113083	LOX	5.70164	7.56349e-05
ENSG00000139725	RHOF	-3.03352	2.21401e-07		ENSG00000147027	TMEM47	5.6778	1.79021e-06
ENSG00000125618	PAX8	-2.99767	0.0022817		ENSG00000159674	SPON2	5.58452	0.00111213
ENSG00000185885	IFITM1	-2.96898	0.0340799		ENSG00000122585	NPY	5.52934	0.000702696
ENSG00000106025	TSPAN12	-2.95762	0.00587697		ENSG00000004776	HSPB6	5.50659	0.00222214
ENSG00000105048	TNNT1	-2.89819	0.00313062		ENSG00000205364	MT1M	5.43039	6.04487e-07
ENSG00000214517	PPME1	-2.89669	6.34909e-06		ENSG00000141469	SLC14A1	5.41749	0.000948827
ENSG00000272398	CD24	-2.86983	0.0287745		ENSG00000148671	ADIRF	5.40025	7.07243e-05
ENSG00000145107	TM4SF19	-2.86539	1.00713e-06		ENSG00000164530	PI16	5.36854	0.000420561
ENSG00000178150	ZNF114	-2.86235	0.000128155		ENSG00000141753	IGFBP4	5.34064	5.13597e-05
ENSG00000184363	PKP3	-2.84352	5.65173e-05		ENSG00000154175	ABI3BP	5.3296	5.32236e-06
ENSG00000124107	SLPI	-2.83074	0.0147206		ENSG00000102265	TIMP1	5.28314	8.69956e-06
ENSG00000179046	TRIML2	-2.81325	0.00268763		ENSG00000184254	ALDH1A3	5.28078	0.000980544
ENSG00000136997	MYC	-2.80392	0.000386105		ENSG00000136542	GALNT5	5.27589	5.17687e-05
ENSG00000160886	LY6K	-2.80134	0.000977871		ENSG00000164932	CTHRC1	5.26489	0.000250627
ENSG00000170801	HTRA3	-2.78556	0.0231168		ENSG00000196611	MMP1	5.16151	0.000859883
ENSG00000164251	F2RL1	-2.73769	0.00215835		ENSG00000161281	COX7A1	5.15799	1.09004e-05
ENSG00000064205	CCN5	-2.7291	0.0334684		ENSG00000204291	COL15A1	5.14448	2.47961e-05
ENSG00000151632	AKR1C2	-2.68768	0.0234482		ENSG00000166963	MAP1A	5.1292	6.72809e-05
ENSG00000242221	PSG2	-2.68033	0.0206328		ENSG00000132386	SERPINF1	5.11572	0.000278472
ENSG00000133321	PLAAT4	-2.6763	0.00678192		ENSG00000125965	GDF5	5.11513	7.85853e-06
ENSG00000198074	AKR1B10	-2.63982	0.0196307		ENSG00000182667	NTM	5.05331	2.17667e-06
ENSG00000105655	ISYNA1	-2.63488	0.000100476		ENSG00000078098	FAP	5.0466	0.000117817
ENSG00000186472	PCLO	-2.60136	0.000469437		ENSG00000017483	SLC38A5	4.9967	0.000467326
ENSG00000196110	ZNF699	-2.56535	0.00162776		ENSG00000105509	HAS1	4.98439	0.00028922
ENSG00000133169	BEX1	-2.54711	0.0483878		ENSG00000122176	FMOD	4.98303	9.44929e-06
ENSG00000075275	CELSR1	-2.5404	5.31947e-05		ENSG00000058085	LAMC2	4.94638	8.52915e-05
ENSG00000123453	SARDH	-2.53809	0.0205451		ENSG00000137809	ITGA11	4.919	0.00099193
ENSG00000277586	NEFL	-2.53718	0.0644427		ENSG00000189129	PLAC9	4.91447	7.57409e-06
ENSG00000125730	C3	-2.49911	0.0344328		ENSG00000129538	RNASE1	4.91198	0.000458741
ENSG00000127399	LRRC61	-2.46763	0.0152507		ENSG00000119681	LTBP2	4.90976	2.10255e-05
ENSG00000145335	SNCA	-2.45614	0.0162845		ENSG00000105825	TFPI2	4.87841	0.00159091
ENSG00000259207	ITGB3	-2.45233	0.0247162		ENSG00000174807	CD248	4.86718	0.0142544
ENSG00000166669	ATF7IP2	-2.43661	0.00261397		ENSG00000162407	PLPP3	4.85937	0.000505021
ENSG00000196268	ZNF493	-2.40901	0.00444871		ENSG00000284686	AC119674.2	4.84734	0.000433289
ENSG00000167637	ZNF283	-2.4066	0.00233051		ENSG00000116690	PRG4	4.8218	0.00201549
ENSG00000197020	ZNF100	-2.39468	0.00195969		ENSG00000188783	PRELP	4.81106	3.01409e-05
ENSG00000242114	MTFP1	-2.38309	1.58556e-06		ENSG00000181195	PENK	4.76219	0.000604451
ENSG00000133466	C1QTNF6	-2.37901	0.00295439		ENSG00000137507	LRRC32	4.72745	5.54179e-05
ENSG00000088726	TMEM40	-2.33106	0.000798367		ENSG00000118523	CCN2	4.72565	0.00062715
ENSG00000198910	L1CAM	-2.32814	0.0125699		ENSG00000143867	OSR1	4.724	1.00157e-07
ENSG00000128271	ADORA2A	-2.32739	0.00352332		ENSG00000101134	DOK5	4.62089	1.7081e-06
ENSG00000141524	TMC6	-2.3166	4.3348e-05		ENSG00000149090	PAMR1	4.6056	8.61309e-06
ENSG00000183696	UPP1	-2.31369	0.000559417		ENSG00000093072	ADA2	4.58053	1.31429e-06
ENSG00000196705	ZNF431	-2.31152	0.0022641		ENSG00000163710	PCOLCE2	4.56089	0.000536059
ENSG00000166689	PLEKHA7	-2.26724	0.00806432		ENSG00000165140	FBP1	4.5436	0.000204893
ENSG00000101057	MYBL2	-2.26612	0.000144119		ENSG00000109743	BST1	4.53775	0.00414314
ENSG00000176485	PLAAT3	-2.25552	0.00139018		ENSG00000149557	FEZ1	4.53381	2.97208e-08
ENSG00000242265	PEG10	-2.25111	0.00840954		ENSG00000139629	GALNT6	4.51255	0.000860805
ENSG00000069482	GAL	-2.25048	0.0082064		ENSG00000122786	CALD1	4.51088	4.85962e-06
ENSG00000019582	CD74	-2.25039	0.0145596		ENSG00000139278	GLIPR1	4.48476	3.82136e-07
ENSG00000110660	SLC35F2	-2.24024	0.00215515		ENSG00000278893	AC010533.1	4.45478	2.8488e-10
ENSG00000164292	RHOBTB3	-2.2315	0.000374576		ENSG00000122641	INHBA	4.44594	0.000136895
ENSG00000143674	MAP3K21	-2.20755	0.000207281		ENSG00000109511	ANXA10	4.43578	0.000796819
ENSG00000170381	SEMA3E	-2.19151	0.0137946		ENSG00000204183	GDF5OS	4.42804	9.60308e-06
ENSG00000148154	UGCG	-2.18653	0.000193203		ENSG00000163827	LRRC2	4.42712	3.73645e-05
ENSG00000188707	ZBED6CL	-2.18531	0.015572		ENSG00000102802	MEDAG	4.424	5.1302e-06
ENSG00000106853	PTGR1	-2.17836	0.00369138		ENSG00000152049	KCNE4	4.41904	3.63533e-05
ENSG00000188735	TMEM120B	-2.17703	2.00754e-06		ENSG00000087303	NID2	4.38391	0.000161406
ENSG00000123843	C4BPB	-2.15788	0.0793523		ENSG00000082482	KCNK2	4.36352	0.000118259
ENSG00000073060	SCARB1	-2.14537	0.00225309		ENSG00000134853	PDGFRA	4.34994	1.94579e-05
ENSG00000076554	TPD52	-2.14489	0.0282593		ENSG00000136999	CCN3	4.34018	0.00115629
ENSG00000250479	CHCHD10	-2.13351	0.00186633		ENSG00000026751	SLAMF7	4.3361	0.00269278
ENSG00000144354	CDCA7	-2.13193	0.00526785		ENSG00000205362	MT1A	4.32162	0.000391379

## Sheet: Table S6
Table S6 - Top 100 up-and downregulated genes in RN5 cell line compared to tumors
Downregulated in RN5 cellline compared to tumors					Upregulated in RN5 cellline compared to tumors
gene_id	gene_name	log2 Ratio	pValue		gene_id	gene_name	log2 Ratio	pValue
ENSMUSG00000029675	Eln	-8.86937	2.65597e-06		ENSMUSG00000039114	Nrn1	4.45359	8.80954e-08
ENSMUSG00000020826	Nos2	-8.63617	1.42805e-08		ENSMUSG00000027796	Smad9	4.16381	5.91219e-08
ENSMUSG00000003545	Fosb	-8.36823	5.76654e-10		ENSMUSG00000049396	Gemin4	3.8273	0.00932345
ENSMUSG00000026574	Dpt	-8.15564	2.40604e-06		ENSMUSG00000037621	Atoh8	3.61106	5.90938e-08
ENSMUSG00000003665	Has1	-8.02112	3.05715e-08		ENSMUSG00000032076	Cadm1	3.52633	1.58403e-05
ENSMUSG00000021091	Serpina3n	-8.01642	3.54893e-06		ENSMUSG00000019773	Fbxo5	3.5244	1.29502e-08
ENSMUSG00000027750	Postn	-7.84687	1.41734e-09		ENSMUSG00000047428	Dlk2	3.50963	3.87961e-08
ENSMUSG00000031722	Hp	-7.77986	1.96616e-08		ENSMUSG00000101645	Gm28635	3.48829	0.000156641
ENSMUSG00000040026	Saa3	-7.76586	1.73105e-06		ENSMUSG00000066755	Tnfsf18	3.35823	1.12641e-06
ENSMUSG00000026043	Col3a1	-7.73113	6.38749e-09		ENSMUSG00000020086	H2afy2	3.24736	9.70156e-06
ENSMUSG00000071984	Fndc1	-7.5785	1.36133e-05		ENSMUSG00000020609	Apob	3.16969	9.09926e-06
ENSMUSG00000073418	C4b	-7.40141	0.000111212		ENSMUSG00000057719	Sh3rf2	3.07509	3.60498e-06
ENSMUSG00000090231	Cfb	-7.2388	2.89305e-09		ENSMUSG00000092035	Peg10	3.0566	0.00472446
ENSMUSG00000062345	Serpinb2	-7.23578	1.45484e-07		ENSMUSG00000048922	Cdca2	3.05058	1.02502e-08
ENSMUSG00000025746	Il6	-7.13385	5.31535e-07		ENSMUSG00000039748	Exo1	3.00858	4.18988e-08
ENSMUSG00000048126	Col6a3	-7.07577	7.53438e-08		ENSMUSG00000016386	Mpped2	2.99851	3.86319e-06
ENSMUSG00000027408	Cpxm1	-7.06022	2.23755e-08		ENSMUSG00000054477	Kcnn2	2.9948	1.03136e-05
ENSMUSG00000024011	Pi16	-7.05536	3.74184e-05		ENSMUSG00000035455	Fignl1	2.96308	4.12542e-08
ENSMUSG00000012428	Steap4	-7.02949	6.03376e-10		ENSMUSG00000048562	Sp8	2.957	6.36588e-05
ENSMUSG00000041577	Prelp	-6.91217	4.79551e-07		ENSMUSG00000022464	Slc38a4	2.9451	2.20115e-06
ENSMUSG00000023224	Serping1	-6.88066	4.38953e-05		ENSMUSG00000017499	Cdc6	2.92964	1.51139e-07
ENSMUSG00000004098	Col5a3	-6.73987	2.32502e-08		ENSMUSG00000052353	Cemip	2.89783	7.17977e-08
ENSMUSG00000055030	Sprr2e	-6.73025	1.06599e-05		ENSMUSG00000042745	Id1	2.87296	4.39603e-09
ENSMUSG00000016024	Lbp	-6.72287	4.80322e-07		ENSMUSG00000063632	Sox11	2.87026	1.70515e-07
ENSMUSG00000026822	Lcn2	-6.66702	3.29364e-05		ENSMUSG00000036437	Npy1r	2.84908	1.43051e-05
ENSMUSG00000042254	Cilp	-6.6484	0.00137125		ENSMUSG00000039470	Zdhhc2	2.84901	1.85693e-05
ENSMUSG00000040280	Ndufa4l2	-6.61041	3.11107e-10		ENSMUSG00000051235	Gen1	2.83724	5.30612e-07
ENSMUSG00000029661	Col1a2	-6.60121	0.000754974		ENSMUSG00000051378	Kif18b	2.83365	2.93639e-07
ENSMUSG00000031740	Mmp2	-6.59239	1.08914e-05		ENSMUSG00000040204	Pclaf	2.8325	2.10021e-08
ENSMUSG00000056071	S100a9	-6.56963	0.00551441		ENSMUSG00000016984	Etaa1	2.81386	2.27648e-07
ENSMUSG00000058427	Cxcl2	-6.54014	0.000425436		ENSMUSG00000019577	Pdk4	2.80999	4.12741e-05
ENSMUSG00000030218	Mgp	-6.48532	4.72432e-07		ENSMUSG00000035365	Parpbp	2.80766	4.33097e-06
ENSMUSG00000047501	Cldn4	-6.47908	0.00302059		ENSMUSG00000072082	Ccnf	2.77084	2.52427e-08
ENSMUSG00000005268	Prlr	-6.46708	0.00181941		ENSMUSG00000019942	Cdk1	2.74076	9.75283e-08
ENSMUSG00000038067	Csf3	-6.46328	9.5534e-07		ENSMUSG00000026669	Mcm10	2.73825	1.89946e-08
ENSMUSG00000053475	Tnfaip6	-6.43354	3.58032e-08		ENSMUSG00000022206	Npr3	2.72171	0.000135021
ENSMUSG00000030607	Acan	-6.42824	6.73574e-05		ENSMUSG00000078521	Aunip	2.71284	1.95892e-05
ENSMUSG00000049538	Adamts16	-6.40037	2.62574e-08		ENSMUSG00000040658	Dnph1	2.68797	1.00932e-07
ENSMUSG00000027398	Il1b	-6.35863	0.00118526		ENSMUSG00000005410	Mcm5	2.68636	2.92758e-08
ENSMUSG00000018339	Gpx3	-6.32026	0.00410603		ENSMUSG00000027242	Wdr76	2.68074	5.08907e-07
ENSMUSG00000052305	Hbb-bs	-6.31248	0.0161475		ENSMUSG00000052821	Cysltr1	2.67333	4.48408e-06
ENSMUSG00000056313	Tcim	-6.30476	6.61618e-09		ENSMUSG00000020808	Pimreg	2.669	9.002e-07
ENSMUSG00000037868	Egr2	-6.11344	5.79612e-10		ENSMUSG00000017861	Mybl2	2.66754	4.68533e-07
ENSMUSG00000020681	Ace	-6.06738	1.01398e-05		ENSMUSG00000022034	Esco2	2.65361	5.08128e-05
ENSMUSG00000032068	Plet1	-6.06015	0.000685556		ENSMUSG00000020914	Top2a	2.64502	5.91629e-08
ENSMUSG00000044017	Adgrd1	-6.02327	2.2432e-07		ENSMUSG00000024795	Kif20b	2.62222	7.81019e-07
ENSMUSG00000022371	Col14a1	-6.01759	0.000383393		ENSMUSG00000068744	Psrc1	2.61456	7.9802e-07
ENSMUSG00000045394	Epcam	-6.00563	0.00214244		ENSMUSG00000027379	Bub1	2.6035	5.6729e-08
ENSMUSG00000029380	Cxcl1	-5.98795	3.26226e-09		ENSMUSG00000050107	Haspin	2.59299	2.5368e-06
ENSMUSG00000022425	Enpp2	-5.96099	1.11437e-06		ENSMUSG00000025574	Tk1	2.5817	4.48547e-07
ENSMUSG00000021250	Fos	-5.92376	7.44927e-10		ENSMUSG00000034329	Brip1	2.57438	8.20904e-07
ENSMUSG00000031253	Srpx2	-5.91765	2.94485e-07		ENSMUSG00000036875	Dna2	2.5698	2.13721e-06
ENSMUSG00000033965	Slc16a2	-5.88968	2.35234e-08		ENSMUSG00000037892	Pcdh18	2.56269	7.26591e-07
ENSMUSG00000027996	Sfrp2	-5.87387	9.25294e-09		ENSMUSG00000001403	Ube2c	2.56084	1.33823e-07
ENSMUSG00000038146	Notch3	-5.8614	1.01597e-08		ENSMUSG00000058290	Espl1	2.55691	1.29864e-07
ENSMUSG00000112023	Lilr4b	-5.83401	0.00111819		ENSMUSG00000020330	Hmmr	2.55671	1.69687e-07
ENSMUSG00000029371	Cxcl5	-5.80915	8.01647e-09		ENSMUSG00000034206	Polq	2.55317	8.95873e-07
ENSMUSG00000069917	Hba-a2	-5.79115	0.0259825		ENSMUSG00000046591	Ticrr	2.55146	1.4454e-06
ENSMUSG00000058354	Krt6a	-5.78583	0.00169585		ENSMUSG00000037157	Il22ra1	2.54314	4.73201e-07
ENSMUSG00000029816	Gpnmb	-5.77605	7.19473e-08		ENSMUSG00000026039	Sgo2a	2.54273	1.47357e-07
ENSMUSG00000020077	Srgn	-5.72047	0.00243139		ENSMUSG00000026605	Cenpf	2.5399	6.87827e-07
ENSMUSG00000044786	Zfp36	-5.71735	1.5036e-08		ENSMUSG00000020185	E2f7	2.53732	8.96584e-09
ENSMUSG00000030077	Chl1	-5.66431	0.000914165		ENSMUSG00000026414	Tnnt2	2.53097	8.47844e-06
ENSMUSG00000036446	Lum	-5.6582	0.0018404		ENSMUSG00000040034	Nup43	2.51567	2.09485e-08
ENSMUSG00000047517	Dmbt1	-5.6047	0.00337565		ENSMUSG00000036768	Kif15	2.5108	1.34534e-06
ENSMUSG00000061527	Krt5	-5.58525	0.00102692		ENSMUSG00000027454	Gins1	2.50984	1.61869e-06
ENSMUSG00000056054	S100a8	-5.56806	0.00392455		ENSMUSG00000027496	Aurka	2.50487	1.3162e-07
ENSMUSG00000018916	Csf2	-5.56192	7.44019e-08		ENSMUSG00000017716	Birc5	2.49614	1.09231e-06
ENSMUSG00000039252	Lgi2	-5.52346	0.000198317		ENSMUSG00000021697	Depdc1b	2.49601	4.46398e-06
ENSMUSG00000050370	Ch25h	-5.48811	6.285e-10		ENSMUSG00000027115	Kif18a	2.49288	4.17093e-07
ENSMUSG00000090958	Lrrc32	-5.4754	2.73285e-09		ENSMUSG00000025395	Prim1	2.49074	1.26432e-07
ENSMUSG00000069919	Hba-a1	-5.45586	0.0232481		ENSMUSG00000020644	Id2	2.49024	2.26514e-05
ENSMUSG00000024810	Il33	-5.43999	7.6528e-09		ENSMUSG00000022033	Pbk	2.48216	3.57761e-07
ENSMUSG00000021388	Aspn	-5.42483	9.94141e-06		ENSMUSG00000023940	Sgo1	2.47693	2.49148e-06
ENSMUSG00000026725	Tnn	-5.42235	0.000850194		ENSMUSG00000040084	Bub1b	2.47087	2.73147e-07
ENSMUSG00000032420	Nt5e	-5.41317	4.83294e-10		ENSMUSG00000026683	Nuf2	2.46952	2.98847e-06
ENSMUSG00000028369	Svep1	-5.41267	0.0132231		ENSMUSG00000020897	Aurkb	2.46108	3.38725e-07
ENSMUSG00000024041	Cryaa	-5.39323	3.46983e-08		ENSMUSG00000038379	Ttk	2.45026	3.58044e-05
ENSMUSG00000022126	Acod1	-5.38968	0.00329829		ENSMUSG00000027323	Rad51	2.44194	1.9294e-07
ENSMUSG00000056457	Prl2c3	-5.36646	0.00147479		ENSMUSG00000020493	Prr11	2.43545	4.8563e-08
ENSMUSG00000004655	Aqp1	-5.32545	0.000137491		ENSMUSG00000012443	Kif11	2.42821	1.88953e-07
ENSMUSG00000042436	Mfap4	-5.31178	6.60016e-05		ENSMUSG00000003779	Kif20a	2.42698	1.98387e-06
ENSMUSG00000004371	Il11	-5.30458	0.000213656		ENSMUSG00000032344	Cgas	2.42314	6.98825e-06
ENSMUSG00000004885	Crabp2	-5.29466	2.98026e-09		ENSMUSG00000027654	Fam83d	2.42034	8.46014e-07
ENSMUSG00000028214	Gem	-5.27864	2.14804e-07		ENSMUSG00000030616	Sytl2	2.41939	1.55479e-06
ENSMUSG00000019359	Gdpd2	-5.26539	1.60918e-08		ENSMUSG00000018362	Kpna2	2.41843	2.91482e-08
ENSMUSG00000053113	Socs3	-5.26229	6.63983e-09		ENSMUSG00000005470	Asf1b	2.4182	1.9069e-06
ENSMUSG00000020120	Plek	-5.25986	0.000775777		ENSMUSG00000036223	Ska1	2.41647	2.31172e-05
ENSMUSG00000023034	Nr4a1	-5.2473	5.93278e-08		ENSMUSG00000055612	Cdca7	2.41621	1.00291e-07
ENSMUSG00000032363	Adamts7	-5.23728	4.30243e-10		ENSMUSG00000017550	Atad5	2.41261	6.61786e-07
ENSMUSG00000031825	Crispld2	-5.22181	0.000214203		ENSMUSG00000020469	Myl7	2.41145	0.00011997
ENSMUSG00000020108	Ddit4	-5.21494	7.37972e-09		ENSMUSG00000041431	Ccnb1	2.38832	4.23817e-08
ENSMUSG00000112148	Lilrb4a	-5.2029	0.00108564		ENSMUSG00000019866	Crybg1	2.38316	2.77574e-06
ENSMUSG00000026628	Atf3	-5.19759	1.57866e-08		ENSMUSG00000027699	Ect2	2.38032	7.85197e-08
ENSMUSG00000024164	C3	-5.19234	3.22307e-07		ENSMUSG00000015880	Ncapg	2.37964	3.31624e-07
ENSMUSG00000035105	Egln3	-5.15401	1.13887e-08		ENSMUSG00000051220	Ercc6l	2.37367	1.28121e-06
ENSMUSG00000037902	Sirpa	-5.15326	1.61558e-09		ENSMUSG00000022322	Shcbp1	2.37128	3.11849e-06
ENSMUSG00000068196	Col8a1	-5.1525	1.72524e-09		ENSMUSG00000027326	Knl1	2.37078	3.54587e-06
ENSMUSG00000028600	Podn	-5.13888	5.28585e-06		ENSMUSG00000022178	Ajuba	2.35613	5.78732e-08
ENSMUSG00000024076	Vit	-5.12035	3.2825e-09		ENSMUSG00000041859	Mcm3	2.35573	6.14413e-07
