# Supplementary material for: Genomic and Transcriptomic Analyses of Malignant Pleural Mesothelioma (MPM) Samples Reveal Crucial Insights for Preclinical Testing
Source: Cancers (Basel). 2023 May 18;15(10):2813. doi: 10.3390/cancers15102813 (PMC10216513; doi:10.3390/cancers15102813)
Supplement: Supplementary file 1 [file cancers-15-02813-s001.zip › Table S7_Westernblots.xlsx]

## Sheet: WB Quantifications
Name	Marker	Vol. (Int.)	Local Bg. Corr. Vol.	Rolling Bg. Corr. Vol.	Area	Rf
MPM659	CDKN2A	6546855	3602141	5516288	310	0.764
	CDKN2A Tubulin	7254473	6322259	6914816	280	0.517
	Podoplanin	870243	107311	135936	792	0.534
	Podoplanin GAPDH	6442063	5302743	6107648	324	0.572
	Mesothelin	5529369	3792800	4537088	342	0.796
	Mesothelin GAPDH	6963392	5559152	6701824	256	0.614
	NF2 Band 1	4425147	3372317	3758592	264	0.45
	NF2 Band 2	2368248	1187299	1418496	256	0.5
	NF2 Band 3	14014464	11509337	12337408	385	0.555
	NF2 Band 4	5735643	4169410	4687360	297	0.603
	NF2 GAPDH	13894203	9921212	12902400	400	0.613
MPM665	CDKN2A	6034460	485951	2987776	680	0.771
	CDKN2A Tubulin	5848401	4976711	5490432	272	0.517
	Podoplanin	28577140	24861193	26576128	714	0.541
	Podoplanin GAPDH	6161193	4929862	5604352	264	0.572
	Mesothelin	4340570	118750	975616	588	0.794
	Mesothelin GAPDH	6782454	5561041	6469888	264	0.612
	NF2 Band 1	6442790	4990826	5238016	270	0.447
	NF2 Band 2	13201073	10593707	11301632	352	0.498
	NF2 Band 3	6534307	4536174	4868864	310	0.55
	NF2 Band 4	12980643	10327307	11457792	352	0.601
	NF2 GAPDH	10890143	7121077	10176000	256	0.613
MPM671	CDKN2A	23502780	15463542	19909888	520	0.771
	CDKN2A Tubulin	7136130	6096048	6637824	324	0.513
	Podoplanin	6120882	3741020	4631552	480	0.546
	Podoplanin GAPDH	6880524	5529356	6477312	315	0.57
	Mesothelin	17274226	11927990	13629952	390	0.791
	Mesothelin GAPDH	7250837	5823455	6835456	324	0.61
	NF2 Band 1	4340208	3123072	3194112	330	0.438
	NF2 Band 2	11147141	8990848	9416704	374	0.488
	NF2 Band 3	12490444	9895774	9874432	455	0.543
	NF2 Band 4	18180401	15176674	15504896	504	0.591
	NF2 GAPDH	11078334	5917467	10141184	310	0.606
MPM673	CDKN2A	11767075	6434847	8905984	378	0.768
	CDKN2A Tubulin	7639410	6159707	6948096	451	0.503
	Podoplanin	5592689	1015630	2177792	792	0.534
	Podoplanin GAPDH	7016821	5705473	6611456	315	0.563
	Mesothelin	9061075	4693600	6425600	380	0.787
	Mesothelin GAPDH	6985594	5716552	6570496	324	0.602
	NF2 Band 1	1621382	1065643	1132032	264	0.428
	NF2 Band 2	3539198	2661226	2884864	256	0.478
	NF2 Band 3	6534551	5192298	5396736	363	0.534
	NF2 Band 4	5607040	4369446	4803840	297	0.584
	NF2 GAPDH	7897732	5927446	7415040	248	0.602
MPM680	CDKN2A	11844599	7348931	9025024	370	0.764
	CDKN2A Tubulin	6230426	5242174	5792512	297	0.499
	Podoplanin	9618774	2530227	3019264	648	0.53
	Podoplanin GAPDH	7545350	6212947	7033088	333	0.555
	Mesothelin	10587736	6401593	7328768	380	0.78
	Mesothelin GAPDH	8193051	6864921	7734528	360	0.593
	NF2 Band 1	3864210	3106703	3388928	248	0.428
	NF2 Band 2	1972726	1381600	1448448	256	0.476
	NF2 Band 3	5673400	4564891	4889600	340	0.531
	NF2 Band 4	3884929	3068852	3167232	350	0.579
	NF2 GAPDH	11577500	9142559	10875392	342	0.6
MPM686	CDKN2A	5209027	1669916	2340864	533	0.764
	CDKN2A Tubulin	4595031	3827418	4165120	280	0.492
	Podoplanin	11611034	2750273	2643200	1419	0.525
	Podoplanin GAPDH	5360202	4364367	5063680	288	0.55
	Mesothelin	10017412	2055766	3297792	656	0.768
	Mesothelin GAPDH	5638820	4721608	5337344	296	0.588
	NF2 Band 1	12701851	10915649	11898624	330	0.428
	NF2 Band 2	1882846	1232673	1212672	256	0.476
	NF2 Band 3	3180633	2230323	2486016	340	0.529
	NF2 Band 4	1217657	686142	712192	297	0.579
	NF2 GAPDH	7957129	6321688	7412736	266	0.6
MPM690	CDKN2A	8428503	4520094	5708032	418	0.755
	CDKN2A Tubulin	7270270	6242396	6893824	288	0.49
	Podoplanin	3294846	35472	192000	792	0.532
	Podoplanin GAPDH	7616932	6239948	7198464	304	0.555
	Mesothelin	13039596	5450015	5473792	418	0.766
	Mesothelin GAPDH	7385238	6318431	7042560	333	0.586
	NF2 Band 1	4705891	3658579	3901952	315	0.43
	NF2 Band 2	2993119	1557266	1509888	442	0.483
	NF2 Band 3	12429101	10553141	11191808	350	0.531
	NF2 Band 4	3120844	2143698	2205952	350	0.579
	NF2 GAPDH	12328283	9642552	11432704	351	0.602
MPM693	CDKN2A	5836966	550424	1430784	640	0.75
	CDKN2A Tubulin	6445614	5490212	5959936	315	0.487
	Podoplanin	28758019	20840409	23290624	714	0.541
	Podoplanin GAPDH	7293917	6032313	6629120	280	0.558
	Mesothelin	12081337	659311	2682880	570	0.741
	Mesothelin GAPDH	7266331	6221858	6953984	306	0.583
	NF2 Band 1	7514893	5992953	6245376	288	0.43
	NF2 Band 2	13489537	11230443	11693824	352	0.481
	NF2 Band 3	6410506	4896801	5011712	320	0.534
	NF2 Band 4	10352332	8671717	9249280	320	0.582
	NF2 GAPDH	11220207	8044156	10492160	296	0.604
MPM700	CDKN2A	1645439	42463	120320	476	0.748
	CDKN2A Tubulin	5288182	4489746	4907776	297	0.48
	Podoplanin	45005642	36376216	39531776	918	0.522
	Podoplanin GAPDH	5120278	4252988	4716288	264	0.558
	Mesothelin	14993202	1633723	2878976	936	0.706
	Mesothelin GAPDH	5177438	4415920	4882432	288	0.578
	NF2 Band 1	14022561	11369908	9225984	360	0.428
	NF2 Band 2	6081211	4506866	1424640	252	0.478
	NF2 Band 3	3332101	2220624	2301952	300	0.531
	NF2 Band 4	4760948	3746793	3908096	360	0.584
	NF2 GAPDH	8344423	6525094	7716352	272	0.604
MPM716	CDKN2A	1312964	59425	29696	476	0.745
	CDKN2A Tubulin	4741261	3954765	4459520	270	0.473
	Podoplanin	1888619	287659	809728	476	0.539
	Podoplanin GAPDH	3563575	2924927	1161728	203	0.558
	Mesothelin	11483335	1388419	2294272	782	0.709
	Mesothelin GAPDH	3980514	3244079	3852288	252	0.573
	NF2 Band 1	2378623	1707446	1949184	240	0.428
	NF2 Band 2	676206	50994	116736	320	0.481
	NF2 Band 3	5879513	4868891	1423104	288	0.531
	NF2 Band 4	1305717	786165	872448	248	0.577
	NF2 GAPDH	6951129	5817130	6508544	288	0.604

## Sheet: CDKN2A
CDKN2A							CDKN2A (Tubulin)

## Sheet: Podoplanin
Podoplanin							Podoplanin loading control (GAPDH)

## Sheet: Mesothelin
Mesothelin							Mesothelin loading control (GAPDH)

## Sheet: NF2
NF2							NF2 (GAPDH)
